# Supplementary material for: Facile synthesis of single crystalline gold nanoplates and SERS investigations of 4-aminothiophenol
Source: Royal Society of Chemistry journal article supplement (doi:10.1039/c3ce00076a), 2013-01-01
Supplement: c3ce00076a.pdf [file c3ce00076a.pdf]

### Supporting information

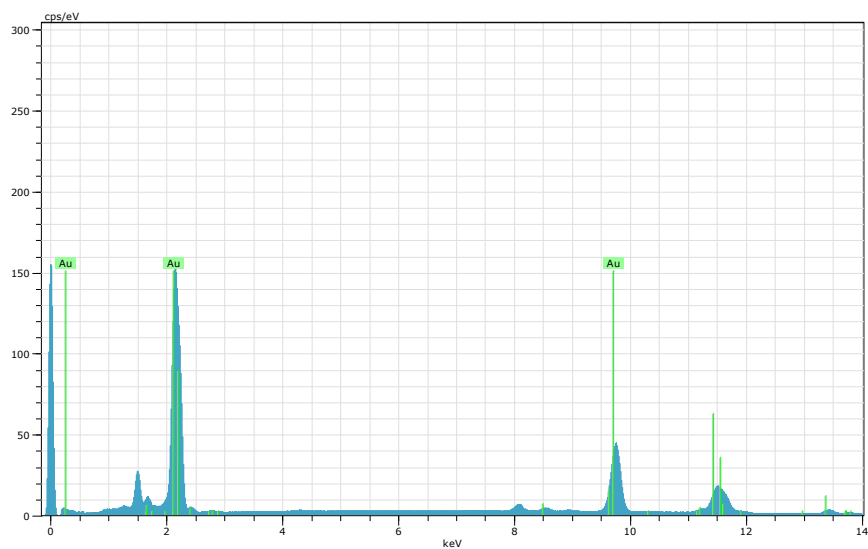

**Fig. S1** Energy-dispersive X-ray (EDX) spectrum indicates that the nanoplates are pure metallic Au.
